# Supplementary material
Source: Research Square preprint supplement (doi:10.21203/rs.3.rs-9600666/v1)
Supplement: Supplementary file 1 [file 24b36e0705596cc7093b32aa.docx]

**Supplemental Tables and Figures:**

**Supplementary Table 1.** Summary GWAS statistics for the mvAge polygenic risk scores

| **rsID** | **Location (chr, pos)** | **Odds Ratio (OR)** | **Weight** |
| --- | --- | --- | --- |
| rs11066320 | 12, 112906415 | 0.993683 | 0.656049 |
| rs1126809 | 11, 89017961 | 1.006641 | 0.502494 |
| rs114298671 | 4, 3281869 | 1.008907 | 0.349714 |
| rs12203592 | 6, 396321 | 1.010903 | 0.341028 |
| rs1230666 | 1, 114173410 | 0.989890 | 0.373095 |
| rs12705966 | 7, 114248851 | 0.993978 | 0.609754 |
| rs1275922 | 2, 26932887 | 0.993025 | 0.520961 |
| rs12769128 | 10, 21883430 | 1.006005 | 0.566657 |
| rs13141210 | 4, 67891641 | 0.994183 | 0.705691 |
| rs142158911 | 19, 11190534 | 0.989943 | 0.335112 |
| rs157581 | 19, 45395714 | 1.016115 | 0.455851 |
| rs159428 | 20, 31099311 | 1.006271 | 0.696491 |
| rs16843603 | 4, 2928577 | 0.992974 | 0.552449 |
| rs16843836 | 4, 3113337 | 0.992028 | 0.555968 |
| rs1689406 | 12, 89754726 | 1.006968 | 0.448107 |
| rs17499404 | 4, 38385479 | 0.994367 | 0.674759 |
| rs2186800 | 11, 113242860 | 0.993881 | 0.679117 |
| rs2271961 | 3, 49878113 | 1.006084 | 0.686440 |
| rs2613508 | 1, 72833582 | 1.007699 | 0.422966 |
| rs2643826 | 3, 27562988 | 1.006344 | 0.672533 |
| rs268 | 8, 19813529 | 1.024702 | 0.117983 |
| rs28455998 | 15, 41430969 | 1.005692 | 0.704273 |
| rs28637671 | 4, 67780392 | 1.006349 | 0.536936 |
| rs2972566 | 19, 45354238 | 1.007926 | 0.390000 |
| rs34891485 | 17, 40263458 | 1.014566 | 0.229521 |
| rs35198068 | 10, 114754784 | 1.008551 | 0.563116 |
| rs36072649 | 4, 140939110 | 0.994064 | 0.604814 |
| rs3768321 | 1, 40035928 | 1.007930 | 0.433474 |
| rs405509 | 19, 45408836 | 0.993358 | 0.695773 |
| rs449647 | 19, 45408564 | 0.992246 | 0.406202 |
| rs472103 | 3, 173122492 | 1.005909 | 0.682056 |
| rs4766578 | 12, 111904371 | 0.992465 | 0.690724 |
| rs55686423 | 12, 49963534 | 0.990023 | 0.297439 |
| rs55730499 | 6, 161005610 | 1.021801 | 0.274864 |
| rs6062322 | 20, 62441599 | 0.992945 | 0.440227 |
| rs61905747 | 11, 113639842 | 1.009143 | 0.388716 |
| rs66906321 | 2, 630070 | 1.007506 | 0.424146 |
| rs6859 | 19, 45382034 | 0.991944 | 0.663626 |
| rs6907508 | 6, 34592090 | 1.010244 | 0.318434 |
| rs7174250 | 15, 81018587 | 1.005625 | 0.674759 |
| rs7412 | 19, 45412079 | 0.979426 | 0.250240 |
| rs7742789 | 6, 43345803 | 1.006054 | 0.589830 |
| rs78438918 | 2, 100630115 | 0.992192 | 0.407431 |
| rs7859727 | 9, 22102165 | 1.009182 | 0.698642 |
| rs79570361 | 6, 161170855 | 1.010686 | 0.287228 |
| rs8042849 | 15, 78817929 | 0.991840 | 0.625060 |
| rs9277988 | 6, 33306235 | 1.007102 | 0.442493 |
| rs9295128 | 6, 160751531 | 1.038381 | 0.113666 |
| rs9355297 | 6, 161023165 | 0.992802 | 0.514198 |
| rs9364552 | 6, 160782934 | 1.005751 | 0.706399 |
| rs940088 | 17, 47145848 | 0.993680 | 0.535070 |
| rs980183 | 2, 59311536 | 0.993676 | 0.620242 |

List of single nucleotide polymorphisms (SNPs) used in constructing the mvAge polygenic risk score, including rsID, chromosomal location (chromosome and position), odds ratio (OR), and corresponding weight derived from GWAS summary statistics (Beta and SE).


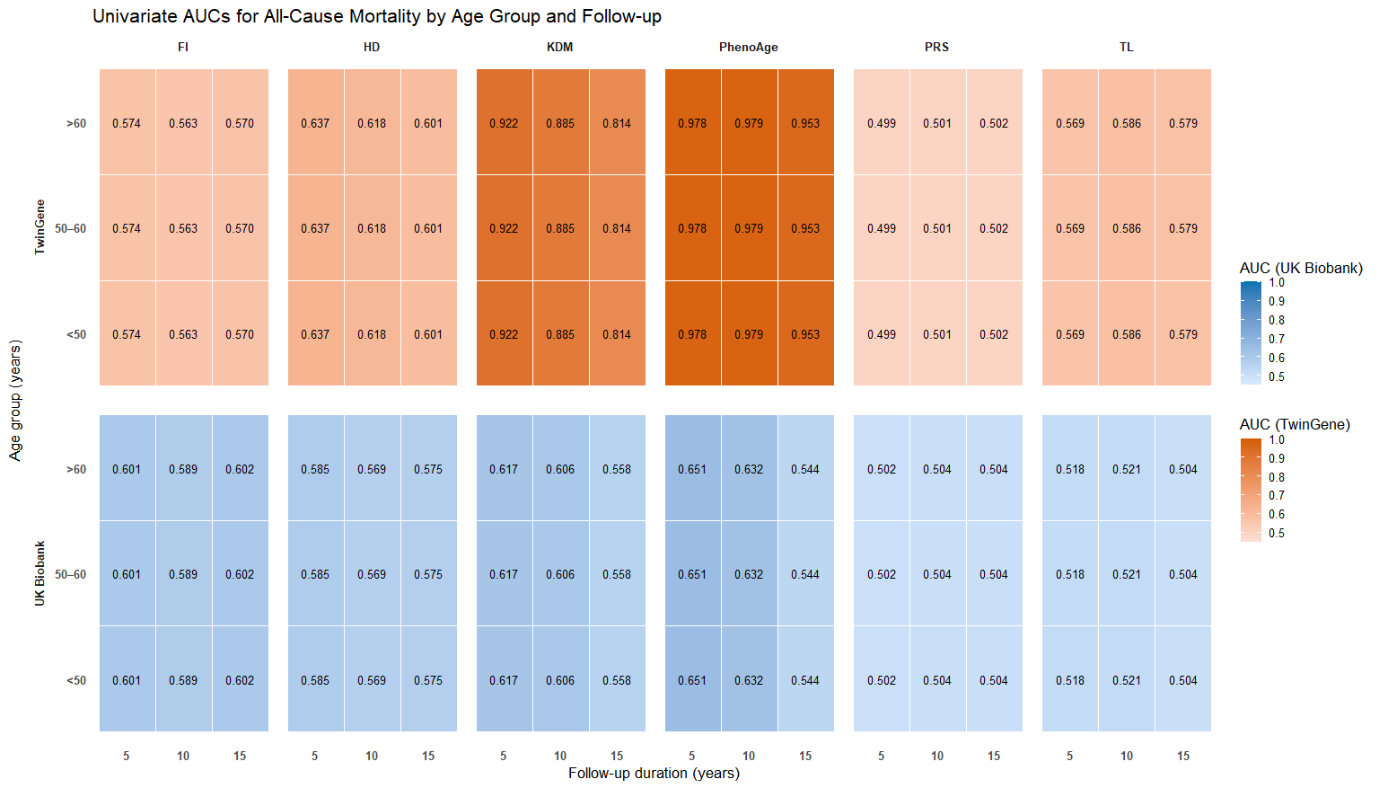


**Fig S1. Univariate discrimination (AUC) for all-cause mortality by age group and follow-up horizon in TwinGene and UK Biobank.** Heatmaps display area under the receiver operating characteristic curve (AUC) values from univariate models for mortality prediction stratified by baseline age group (<50, 50–60, >60 years) and follow-up duration (5, 10, and 15 years). Columns show predictors (FI, HD, KDM, PhenoAge, PRS, TL) and rows are cohorts (TwinGene and UK Biobank). Each tile reports the AUC value; tile color intensity reflects AUC magnitude using cohort-specific color scales (TwinGene: orange; UK Biobank: blue). PRS: Polygenic Risk Scores, PhenoAge: Phenotypic Age, KDM: Klemera-Doubal Method, HD: Homeostatic Dysregulation, FI: Frailty Index, TL: adjusted Telomere Length.

**
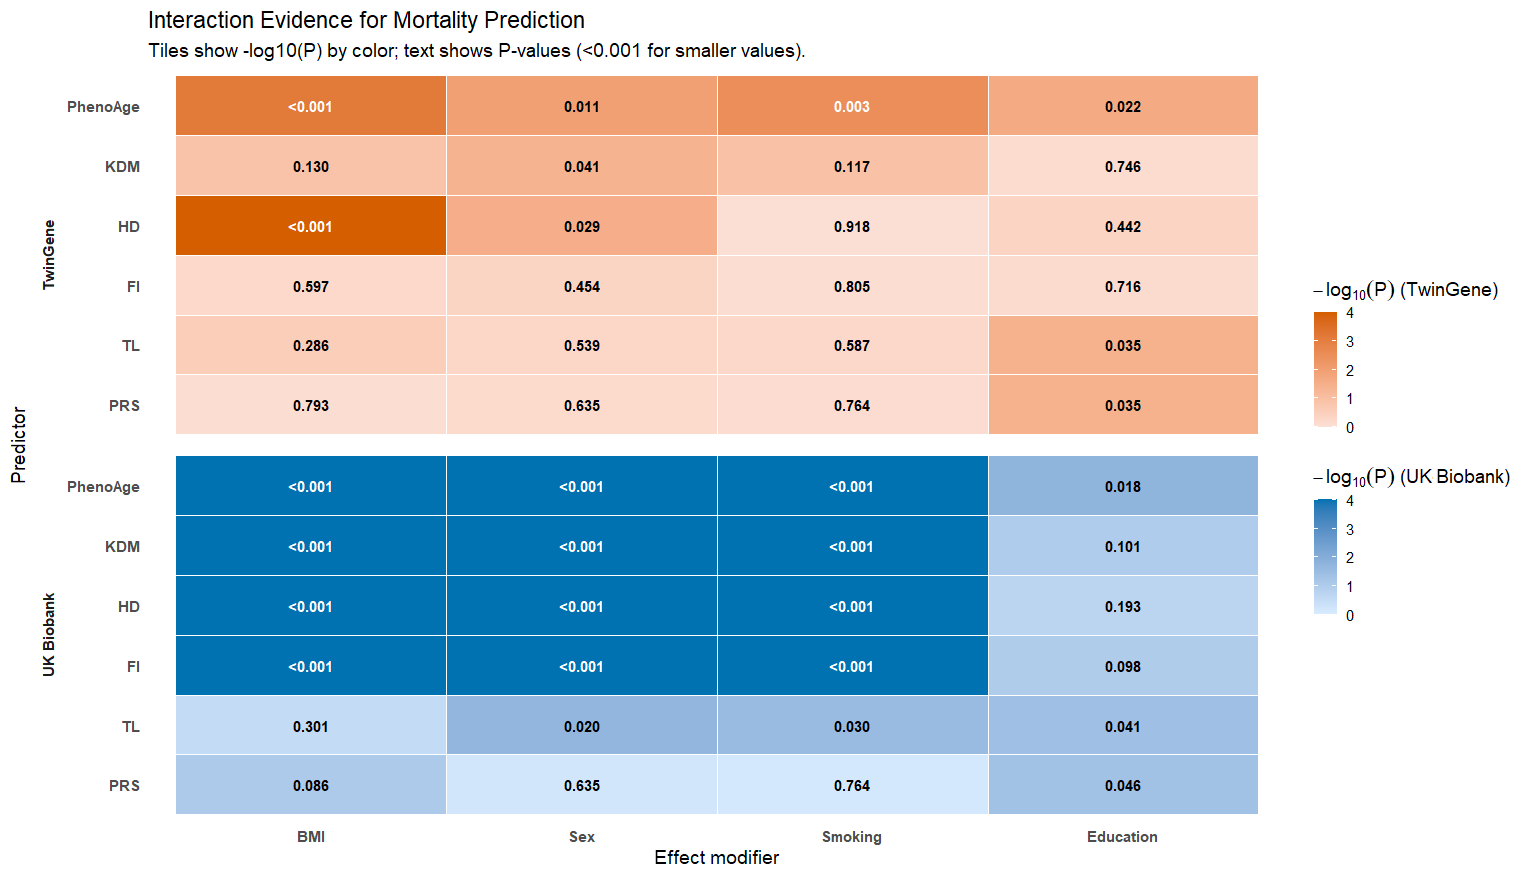
**

**Fig S2. Evidence for effect modification of biological aging measures by lifestyle and demographic factors.** Heatmaps summarize statistical evidence for interaction terms between each predictor (PhenoAge, KDM, HD, FI, TL, PRS) and effect modifiers (BMI, sex, smoking, education) in models of all-cause mortality, shown separately for TwinGene and UK Biobank. Tile color represents −log10(*P*) for the interaction term (stronger color indicates stronger evidence), and each tile reports the corresponding *P*-value (values <0.001 shown as “<0.001”). Cohort-specific color scales are used to match the main figures (TwinGene: orange; UK Biobank: blue). PRS: Polygenic Risk Scores, PhenoAge: Phenotypic Age, KDM: Klemera-Doubal Method, HD: Homeostatic Dysregulation, FI: Frailty Index, TL: adjusted Telomere Length.


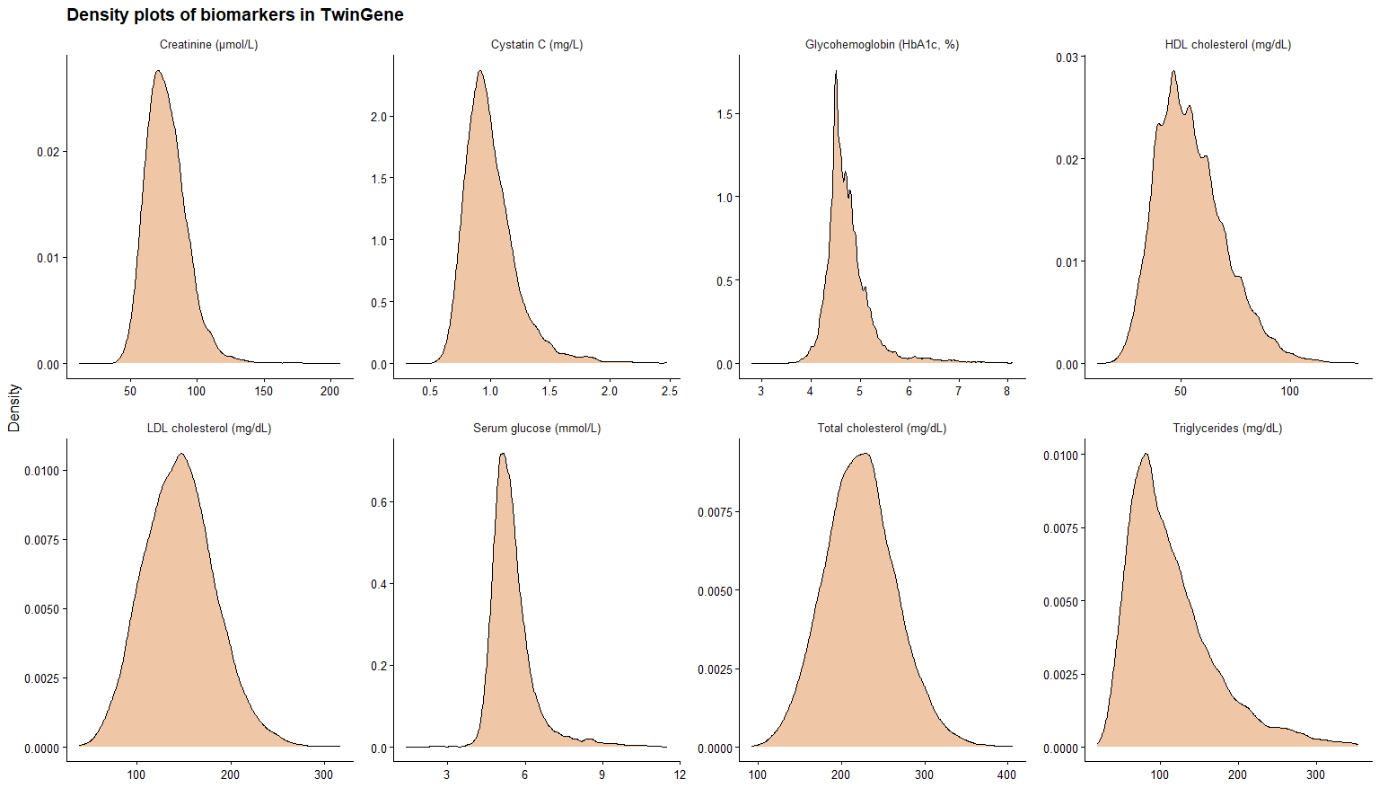


**Fig S3. Density plots of biomarkers in the TwinGene cohort.** This figure shows the distributions of 8-clinical biomarkers used to construct the blood-based biological age estimates in TwinGene. Panels display serum glucose (mmol/L), glycohemoglobin (HbA1c, %), creatinine (µmol/L), cystatin C (mg/L), triglycerides (mg/dL), total cholesterol (mg/dL), LDL and HDL cholesterol (mg/dL). Densities are shown for the analytic sample with complete biomarker data used in downstream modeling.
