# Supplementary material
Source: Research Square preprint supplement (doi:10.21203/rs.3.rs-9600666/v1)
Supplement: Supplementary file 2 [file d5a3ee97717ead52ca463601.docx]

STROBE Statement—checklist of items that should be included in reports of observational studies

|  | Item No | Recommendation |
| --- | --- | --- |
| **Title and abstract** | 1 | (*a*) Indicate the study’s design with a commonly used term in the title or the abstract  Reported in: Title; Abstract. |
| (*b*) Provide in the abstract an informative and balanced summary of what was done and what was found  Reported in: Abstract. |
| Introduction | | |
| Background/rationale | 2 | Explain the scientific background and rationale for the investigation being reported  Reported in: Introduction. |
| Objectives | 3 | State specific objectives, including any prespecified hypotheses  Reported in: Introduction (the last paragraph). |
| Methods | | |
| Study design | 4 | Present key elements of study design early in the paper  Reported in: Materials and Methods (Study population). |
| Setting | 5 | Describe the setting, locations, and relevant dates, including periods of recruitment, exposure, follow-up, and data collection  Reported in: Materials and Methods (Study population; Discovery cohort; Replication cohort; Outcome definition). |
| Participants | 6 | (*a*) *Cohort study*—Give the eligibility criteria, and the sources and methods of selection of participants. Describe methods of follow-up  *Case-control study*—Give the eligibility criteria, and the sources and methods of case ascertainment and control selection. Give the rationale for the choice of cases and controls  *Cross-sectional study*—Give the eligibility criteria, and the sources and methods of selection of participants  Reported in: Materials and Methods (Discovery cohort; Replication cohort; Missingness and analysis sets). |
| (*b*)*Cohort study*—For matched studies, give matching criteria and number of exposed and unexposed  *Case-control study*—For matched studies, give matching criteria and the number of controls per case  N/A (not a matched cohort study). |
| Variables | 7 | Clearly define all outcomes, exposures, predictors, potential confounders, and effect modifiers. Give diagnostic criteria, if applicable  Reported in: Materials and Methods (Biological aging measures; Polygenic risk scores; Outcome definition; Covariates). |
| Data sources/ measurement | 8* | For each variable of interest, give sources of data and details of methods of assessment (measurement). Describe comparability of assessment methods if there is more than one group  Reported in: Materials and Methods (Genetic data; Biological aging measures; Outcome definition; Covariates). |
| Bias | 9 | Describe any efforts to address potential sources of bias  Reported in: Materials and Methods (Missingness and analysis sets; sensitivity models). |
| Study size | 10 | Explain how the study size was arrived at  Reported in: Materials and Methods (Missingness and analysis sets; Fig 1). |
| Quantitative variables | 11 | Explain how quantitative variables were handled in the analyses. If applicable, describe which groupings were chosen and why  Reported in: Materials and Methods (Variable scaling and transformations; subgroup definitions). |
| Statistical methods | 12 | (*a*) Describe all statistical methods, including those used to control for confounding  Reported in: Materials and Methods (Multivariable Cox models and timescale specifications; covariate adjustment; ensemble prediction). |
| (*b*) Describe any methods used to examine subgroups and interactions  Reported in: Materials and Methods (Univariate ROC and survival analyses; Interaction and effect-modification analyses). |
| (*c*) Explain how missing data were addressed  Reported in: Materials and Methods (Missingness and analysis sets). |
| (*d*) *Cohort study*—If applicable, explain how loss to follow-up was addressed  *Case-control study*—If applicable, explain how matching of cases and controls was addressed  *Cross-sectional study*—If applicable, describe analytical methods taking account of sampling strategy  Reported in: Materials and Methods (Outcome definition; censoring procedures). |
| (*e*) Describe any sensitivity analyses  Reported in: Materials and Methods (Multivariable Cox models and timescale specifications—sensitivity models; Sensitivity analyses across strata/horizons). |

Continued on next page

| Results | | |
| --- | --- | --- |
| Participants | 13* | (a) Report numbers of individuals at each stage of study—eg numbers potentially eligible, examined for eligibility, confirmed eligible, included in the study, completing follow-up, and analysed  Reported in: Results (Cohort characteristics and follow-up); Fig 1; Table 1. |
| (b) Give reasons for non-participation at each stage  Reported in: Materials and Methods (Missingness and analysis sets; genetic QC; Fig 1). |
| (c) Consider use of a flow diagram  Reported in Fig 1. |
| Descriptive data | 14* | (a) Give characteristics of study participants (eg demographic, clinical, social) and information on exposures and potential confounders  Reported in: Table 1; Results (Cohort characteristics and follow-up). |
| (b) Indicate number of participants with missing data for each variable of interest  Reported in: Materials and Methods (Missingness and analysis sets; Fig 1). |
| (c) *Cohort study*—Summarise follow-up time (eg, average and total amount)  Reported in: Table 1; Results (Cohort characteristics and follow-up). |
| Outcome data | 15* | *Cohort study*—Report numbers of outcome events or summary measures over time  Reported in: Table 1; Results (Cohort characteristics and follow-up). |
| *Case-control study—*Report numbers in each exposure category, or summary measures of exposure  N/A (case-control study item). |
| *Cross-sectional study—*Report numbers of outcome events or summary measures  N/A (cross-sectional study item). |
| Main results | 16 | (*a*) Give unadjusted estimates and, if applicable, confounder-adjusted estimates and their precision (eg, 95% confidence interval). Make clear which confounders were adjusted for and why they were included  Reported in: Results (Univariate discrimination; Time-to-event associations; Multivariable and ensemble models); Tables 2–3. |
| (*b*) Report category boundaries when continuous variables were categorized  Reported in: Methods (baseline age strata <50, 50–60, >60; horizons 5/10/15 years); Results (Subgroup and interaction analyses). |
| (*c*) If relevant, consider translating estimates of relative risk into absolute risk for a meaningful time period  N/A (no absolute risk translation presented). |
| Other analyses | 17 | Report other analyses done—eg analyses of subgroups and interactions, and sensitivity analyses  Reported in: Results (Subgroup and interaction analyses). |
| Discussion | | |
| Key results | 18 | Summarise key results with reference to study objectives  Reported in: Discussion (summary of key results). |
| Limitations | 19 | Discuss limitations of the study, taking into account sources of potential bias or imprecision. Discuss both direction and magnitude of any potential bias  Reported in: Discussion (Strengths and limitations paragraph). |
| Interpretation | 20 | Give a cautious overall interpretation of results considering objectives, limitations, multiplicity of analyses, results from similar studies, and other relevant evidence  Reported in: Discussion (interpretation of findings). |
| Generalisability | 21 | Discuss the generalisability (external validity) of the study results  Reported in: Discussion (generalisability/transportability). |
| Other information | | |
| Funding | 22 | Give the source of funding and the role of the funders for the present study and, if applicable, for the original study on which the present article is based  Funding statement provided in the PLOS submission system (not in manuscript per PLOS policy); include funders’ role there if required. |

*Give information separately for cases and controls in case-control studies and, if applicable, for exposed and unexposed groups in cohort and cross-sectional studies.

**Note:** An Explanation and Elaboration article discusses each checklist item and gives methodological background and published examples of transparent reporting. The STROBE checklist is best used in conjunction with this article (freely available on the Web sites of PLoS Medicine at http://www.plosmedicine.org/, Annals of Internal Medicine at http://www.annals.org/, and Epidemiology at http://www.epidem.com/). Information on the STROBE Initiative is available at www.strobe-statement.org.
